# Supplementary material for: Forkhead-associated phosphopeptide binding domain 1 (FHAD1) deficiency impaired murine sperm motility
Source: PeerJ. 2024 Mar 29;12:e17142. doi: 10.7717/peerj.17142 (PMC10984166; doi:10.7717/peerj.17142)
Supplement: Supplemental Information 1 [file peerj-12-17142-s001.xlsx]

## Sheet: Sheet1
Table S1. List of primer sequences
Primer Name	Sequence (5' to 3')
Fhad1-/- Genotyping
Fhad1_GT_F	TCTCACATCACATCTTCACA
Fhad1_GT_R	AGTCTATATTCAGAGTCAGAGG
Fhad1 RT-PCR
Fhad1_qPCR_F	GGCAGTAGGCCAGCTAGAGA
Fhad1_qPCR_R	CTCTATCAGCTGCTGGTCCG
18S_qPCR_F	CGGACAGGATTGACAGATTGATAG
18S_qPCR_R	ATGCCAGAGTCTCGTTCGTTAT
