# Supplementary material for: Forkhead-associated phosphopeptide binding domain 1 (FHAD1) deficiency impaired murine sperm motility
Source: PeerJ. 2024 Mar 29;12:e17142. doi: 10.7717/peerj.17142 (PMC10984166; doi:10.7717/peerj.17142)
Supplement: Supplemental Information 2 [file peerj-12-17142-s002.xlsx]

## Sheet: Sheet1
	He	Li	Sp	Lu	Ki	Br	Mu	Fa	St	Gu	Te	Ut	Ov
Rep1	0.001965	0.01855	0.005042	0.926823	0.012061	0.004473	0.010653	0.047243	0.006184	0.00206	3.5559	0.016234	0.00834462
Rep2	0.001971	0.028149	0.003374	0.826421	0.024226	0.003554	0.012949	0.025734	0.003921	0.002336	3.32705	0.019499	0.0159044
Rep3	0.007661	0.075923	0.006056	1.0112	0.039105	0.007892	0.00717	0.050997	0.012758	0.002514	10.1304	0.007907	0.0159743
Rep4	0.007715	0.028143	0.004663	0.906053	0.037656	0.007759	0.008429	0.110037	0.009862	0.003136	6.4661	0.008575	0.0131637
Rep5	0.003802	0.037562	0.010205	0.918933	0.094081	0.006893	0.028379	0.054351	0.004916	0.002122	8.41504	0.012833	0.0297354
Rep6	0.002822	0.017913	0.023815	1.01931	0.079346	0.001637	0.01222	0.018912	0.002804	0.002609	5.51562	0.007041	0.0115681
Rep7	0.00425	0.016615	0.008207	0.902762	0.020469	0.002188	0.005497	0.015299	0.002034	0.000647	3.49702	0.00665	0.0317206
Rep8	0.002969	0.010894	0.002872	0.90197	0.034228	0.002418	0.026939	0.009092	0.001876	0.002785	6.98396	0.00853	0.0218448
