# Supplementary material for: Forkhead-associated phosphopeptide binding domain 1 (FHAD1) deficiency impaired murine sperm motility
Source: PeerJ. 2024 Mar 29;12:e17142. doi: 10.7717/peerj.17142 (PMC10984166; doi:10.7717/peerj.17142)
Supplement: Supplemental Information 3 [file peerj-12-17142-s003.xlsx]

## Sheet: Sheet1
	0W	1W	2W	3W	4W	5W	6W	8W
Rep1	0.077531	0.026298	0.568402	2.22151	4.51774	5.49247	7.08082	4.73592
Rep2	0.009824	0.037786	1.00367	1.97178	3.92661	4.21411	4.00628	6.26762
Rep3	0.008447	0.045114	0.653579	1.26169	2.12937	3.78516	6.87243	5.54231
