# Supplementary material for: Forkhead-associated phosphopeptide binding domain 1 (FHAD1) deficiency impaired murine sperm motility
Source: PeerJ. 2024 Mar 29;12:e17142. doi: 10.7717/peerj.17142 (PMC10984166; doi:10.7717/peerj.17142)
Supplement: Supplemental Information 4 [file peerj-12-17142-s004.xlsx]

## Sheet: Sheet1
	Testis	Tetraploid	Haploid	SSC	TM4
Rep1	5.22151	14.5177	15.4925	0.00221512	0.00517735
Rep2	6.97178	13.9266	15.2141	0.00971775	0.00926611
Rep3	4.26169	12.1294	13.7852	0.006423	0.0029369
