# Supplementary material for: Forkhead-associated phosphopeptide binding domain 1 (FHAD1) deficiency impaired murine sperm motility
Source: PeerJ. 2024 Mar 29;12:e17142. doi: 10.7717/peerj.17142 (PMC10984166; doi:10.7717/peerj.17142)
Supplement: Supplemental Information 5 [file peerj-12-17142-s005.xlsx]

## Sheet: Sheet1
	Fhad1+/+♂× Fhad1+/+♀	Fhad1-/-♂× Fhad1+/+♀
	6	7
	5	6
	7	4
	4	4
	6	3
	6	7
	7	3
	5	4
	4	5
	7	6
	8
Average	5.90909	4.9
Sd	1.30035	1.52388
P-Value		0.11805
