# Supplementary material for: Forkhead-associated phosphopeptide binding domain 1 (FHAD1) deficiency impaired murine sperm motility
Source: PeerJ. 2024 Mar 29;12:e17142. doi: 10.7717/peerj.17142 (PMC10984166; doi:10.7717/peerj.17142)
Supplement: Supplemental Information 6 [file peerj-12-17142-s006.xlsx]

## Sheet: Sheet1
	BW	TW	T/B	AVERAGE	SD	P value
Fhad1+/+-1	26.4628	0.09045	0.003418	0.00333433	0.00016344	0.685797
Fhad1+/+-2	29.5022	0.10134	0.003435
Fhad1+/+-3	29.2826	0.1	0.003415
Fhad1+/+-4	267.987	0.92	0.003433
Fhad1+/+-5	318.729	0.9632	0.003022
Fhad1+/+-6	274.596	0.9015	0.003283
Fhad1-/--1	32.8911	0.1066	0.003241	0.0033685	0.000116838
Fhad1-/--2	33.1408	0.11132	0.003359
Fhad1-/--3	27.67	0.09358	0.003382
Fhad1-/--4	289.898	0.9384	0.003237
Fhad1-/--5	276.779	0.9762	0.003527
Fhad1-/--6	278.038	0.9634	0.003465
