# Supplementary material for: Forkhead-associated phosphopeptide binding domain 1 (FHAD1) deficiency impaired murine sperm motility
Source: PeerJ. 2024 Mar 29;12:e17142. doi: 10.7717/peerj.17142 (PMC10984166; doi:10.7717/peerj.17142)
Supplement: Supplemental Information 7 [file peerj-12-17142-s007.xlsx]

## Sheet: Sheet1
Stage VIII	Fhad1+/+					Fhad1-/-
		RS	Pac	P-Lep			RS	Pac	P-Lep
	Rep1	115.667	48	30.6667		Rep1	101	55	30.6667
	Rep2	140	61.3333	40		Rep2	120.667	48.3333	35
	Rep3	135.333	59.3333	38		Rep3	123	45.6667	36.3333
	Rep4	119.333	50.6667	38.6667		Rep4	116.333	48.3333	36
	Rep5	124.333	55.6667	39		Rep5	107	46	33.6667
	Rep6	131.333	54.3333	41		Rep6	134	56.3333	36.3333
						P value	0.114777	0.106365	0.0965229
