# Supplementary material for: Forkhead-associated phosphopeptide binding domain 1 (FHAD1) deficiency impaired murine sperm motility
Source: PeerJ. 2024 Mar 29;12:e17142. doi: 10.7717/peerj.17142 (PMC10984166; doi:10.7717/peerj.17142)
Supplement: Supplemental Information 8 [file peerj-12-17142-s008.xlsx]

## Sheet: Sheet1
	Total	Nomal	%	Head Abnomal	%	Tail Abnomal	%
Fhad1+/+-1	103	82	79.6117	10	9.70874	11	10.6796
Fhad1+/+-2	101	86	85.1485	6	5.94059	9	8.91089
Fhad1+/+-3	102	83	81.3725	8	7.84314	11	10.7843
Fhad1-/--1	102	83	81.3725	10	9.80392	9	8.82353
Fhad1-/--2	104	82	78.8462	9	8.65385	13	12.5
Fhad1-/--3	102	78	76.4706	11	10.7843	13	12.7451
P value			0.218964		0.199974		0.430744
