# Supplementary material for: Forkhead-associated phosphopeptide binding domain 1 (FHAD1) deficiency impaired murine sperm motility
Source: PeerJ. 2024 Mar 29;12:e17142. doi: 10.7717/peerj.17142 (PMC10984166; doi:10.7717/peerj.17142)
Supplement: Supplemental Information 9 [file peerj-12-17142-s009.xlsx]

## Sheet: Sheet1
	Spermatzoa number（*10^6）	Motile	Progressive
Fhad1+/+-1	6.86	75.84	45.73
Fhad1+/+-2	7.44	69.64	40.73
Fhad1+/+-3	9.46	83.68	37.49
Fhad1+/+-4	8.964	72.489	44.38
Fhad1+/+-5	8.0315	80.62	36.38
Fhad1+/+-6	6.6482	81.6	38.16
Fhad1-/--1	6.5423	76.38	26
Fhad1-/--2	8	64.8612	30.63
Fhad1-/--3	6.83	65	34.46
Fhad1-/--4	6	73.65	34.38
Fhad1-/--5	7.8	68.452	39
Fhad1-/--6	6	67.9654	28
P value	0.105345	0.0233811	0.0073546
