# Supplementary material for: Forkhead-associated phosphopeptide binding domain 1 (FHAD1) deficiency impaired murine sperm motility
Source: PeerJ. 2024 Mar 29;12:e17142. doi: 10.7717/peerj.17142 (PMC10984166; doi:10.7717/peerj.17142)
Supplement: Supplemental Information 10 [file peerj-12-17142-s010.xlsx]

## Sheet: Sheet1
	TUNEL positive cells	TUNEL positive tubules
Fhad1+/+-1	1	10
Fhad1+/+-2	2	28
Fhad1+/+-3	3	15
Fhad1+/+-4	1	19
Fhad1+/+-5	1	22
Fhad1+/+-6	2	20
Fhad1+/+-7	2	15
Fhad1+/+-8	2	23
Fhad1-/--1	3	35
Fhad1-/--2	7	30
Fhad1-/--3	3	25
Fhad1-/--4	2	43
Fhad1-/--5	3	32
Fhad1-/--6	4	45
Fhad1-/--7	3	55
Fhad1-/--8	4	51
P value	0.00657982	0.000270956
