# Supplementary material for: Forkhead-associated phosphopeptide binding domain 1 (FHAD1) deficiency impaired murine sperm motility
Source: PeerJ. 2024 Mar 29;12:e17142. doi: 10.7717/peerj.17142 (PMC10984166; doi:10.7717/peerj.17142)
Supplement: Supplemental Information 11 [file peerj-12-17142-s011.xlsx]

## Sheet: Sheet1
	γH2AX positive foci	γH2AX positive cells
NC-1	21	40
NC-2	22	58
NC-3	23	65
NC-4	12	59
NC-5	12	32
NC-6	22	40
NC-7	29	55
NC-8	17	33
Fhad1-1	3	15
Fhad1-2	3	20
Fhad1-3	3	35
Fhad1-4	2	23
Fhad1-5	3	22
Fhad1-6	4	45
Fhad1-7	3	25
Fhad1-8	4	21
P value	1.25894e-06	0.00172541
