# Supplementary material for: Forkhead-associated phosphopeptide binding domain 1 (FHAD1) deficiency impaired murine sperm motility
Source: PeerJ. 2024 Mar 29;12:e17142. doi: 10.7717/peerj.17142 (PMC10984166; doi:10.7717/peerj.17142)
Supplement: Supplemental Information 13 [file peerj-12-17142-s013.xls]

## Sheet: Sheet1
ITEM TO CHECK	IMPORTANCE	CHECKLIST
EXPERIMENTAL DESIGN
Definition of experimental and control groups	E	Result section
Number within each group	E	Figure legend
Assay carried out by core lab or investigator's lab?	D	348-353
Acknowledgement of authors' contributions	D	348-353
SAMPLE
Description	E	122-131
Volume/mass of sample processed	D	NA
Microdissection or macrodissection	E	122-131
Processing procedure	E	122-131
If frozen - how and how quickly?	E	122-131
If fixed - with what, how quickly?	E	122-131
Sample storage conditions and duration (especially for FFPE samples)	E	122-131
NUCLEIC ACID EXTRACTION
Procedure and/or instrumentation	E	122-131
Name of kit and details of any modifications	E	124
Source of additional reagents used	D	122-131
Details of DNase or RNAse treatment	E	NA
Contamination assessment (DNA or RNA)	E	NA
Nucleic acid quantification	E	126-127
Instrument and method	E	125
Purity (A260/A280)	D	NA
Yield	D	NA
RNA integrity method/instrument	E	128-130
RIN/RQI or Cq of 3' and 5' transcripts	E	128-130
Electrophoresis traces	D	NA
Inhibition testing (Cq dilutions, spike or other)	E	128-130
REVERSE TRANSCRIPTION
Complete reaction conditions	E	123-125
Amount of RNA and reaction volume	E	123-125
Priming oligonucleotide (if using GSP) and concentration	E	123-125
Reverse transcriptase and concentration	E	123-125
Temperature and time	E	123-125
Manufacturer of reagents and catalogue numbers	D	123-125
Cqs with and without RT	D*	123-125
Storage conditions of cDNA	D	123-125
qPCR TARGET INFORMATION
If multiplex, efficiency and LOD of each assay.	E	131
Sequence accession number	E	131
Location of amplicon	D	Figure legend
Amplicon length	E	Supplemental Table S1
In silico specificity screen (BLAST, etc)	E	Supplemental Table S1
Pseudogenes, retropseudogenes or other homologs?	D	NA
Sequence alignment	D	NA
Secondary structure analysis of amplicon	D	NA
Location of each primer by exon or intron (if applicable)	E	NA
What splice variants are targeted?	E	Supplemental Table S1
qPCR OLIGONUCLEOTIDES
Primer sequences	E	Supplemental Table S1
RTPrimerDB Identification Number	D	Supplemental Table S1
Probe sequences	D**	NA
Location and identity of any modifications	E	NA
Manufacturer of oligonucleotides	D	NA
Purification method	D	NA
qPCR PROTOCOL
Complete reaction conditions	E	125-130
Reaction volume and amount of cDNA/DNA	E	125-130
Primer, (probe), Mg++ and dNTP concentrations	E	125-130
Polymerase identity and concentration	E	125-130
Buffer/kit identity and manufacturer	E	125-130
Exact chemical constitution of the buffer	D	125-130
Additives (SYBR Green I, DMSO, etc.)	E	125-130
Manufacturer of plates/tubes and catalog number	D	125-130
Complete thermocycling parameters	E	125-130
Reaction setup (manual/robotic)	D	125-130
Manufacturer of qPCR instrument	E	125-130
qPCR VALIDATION
Evidence of optimisation (from gradients)	D	122-131
Specificity (gel, sequence, melt, or digest)	E	122-131
For SYBR Green I, Cq of the NTC	E	122-131
Standard curves with slope and y-intercept	E	122-131
PCR efficiency calculated from slope	E	122-131
Confidence interval for PCR efficiency or standard error	D	122-131
r2 of standard curve	E	122-131
Linear dynamic range	E	122-131
Cq variation at lower limit	E	122-131
Confidence intervals throughout range	D	122-131
Evidence for limit of detection	E	122-131
If multiplex, efficiency and LOD of each assay.	E	122-131
DATA ANALYSIS
qPCR analysis program (source, version)	E	122-131
Cq method determination	E	122-131
Outlier identification and disposition	E	122-131
Results of NTCs	E	122-131
Justification of number and choice of reference genes	E	122-131
Description of normalisation method	E	122-131
Number and concordance of biological replicates	D	122-131
Number and stage (RT or qPCR) of technical replicates	E	188-191
Repeatability (intra-assay variation)	E	NA
Reproducibility (inter-assay variation, %CV)	D	NA
Power analysis	D	NA
Statistical methods for result significance	E	188-191
Software (source, version)	E	188-191
Cq or raw data submission using RDML	D	188-191
Table 1. MIQE checklist for authors, reviewers and editors. All essential information (E) must be submitted with the manuscript. Desirable
information (D) should be submitted if available. If using primers obtained from RTPrimerDB, information on qPCR target, oligonucleotides,
protocols and validation is available from that source.
*: Assessing the absence of DNA using a no RT assay is essential when first extracting RNA. Once the sample has been validated as
RDNA-free, inclusion of a no-RT control is desirable, but no longer essential.
**: Disclosure of the probe sequence is highly desirable and strongly encouraged. However, since not all commercial pre-designed assay
vendors provide this information, it cannot be an essential requirement. Use of such assays is advised against.
